# Supplementary material for: Community Seedbanks in Uganda: Fostering Access to Genetic Diversity and Its Conservation
Source: MDPI journal article supplement (doi:10.3390/resources11060058), 2022-06-19
Supplement: s1 [file s1]

# Community Seedbanks in Uganda: Fostering Access to Genetic Diversity and Its Conservation

Rose Nankya <sup>1,\*</sup>, Abdel Kader Naino Jika <sup>2</sup>, Paola De Santis <sup>2</sup>, Hannington Lwandasa <sup>3</sup>, Devra Ivy Jarvis <sup>2,4,5</sup> and John Wasswa Mulumba <sup>3</sup>

## SUPPLEMENTARY MATERIALS

### 1. FIGURES

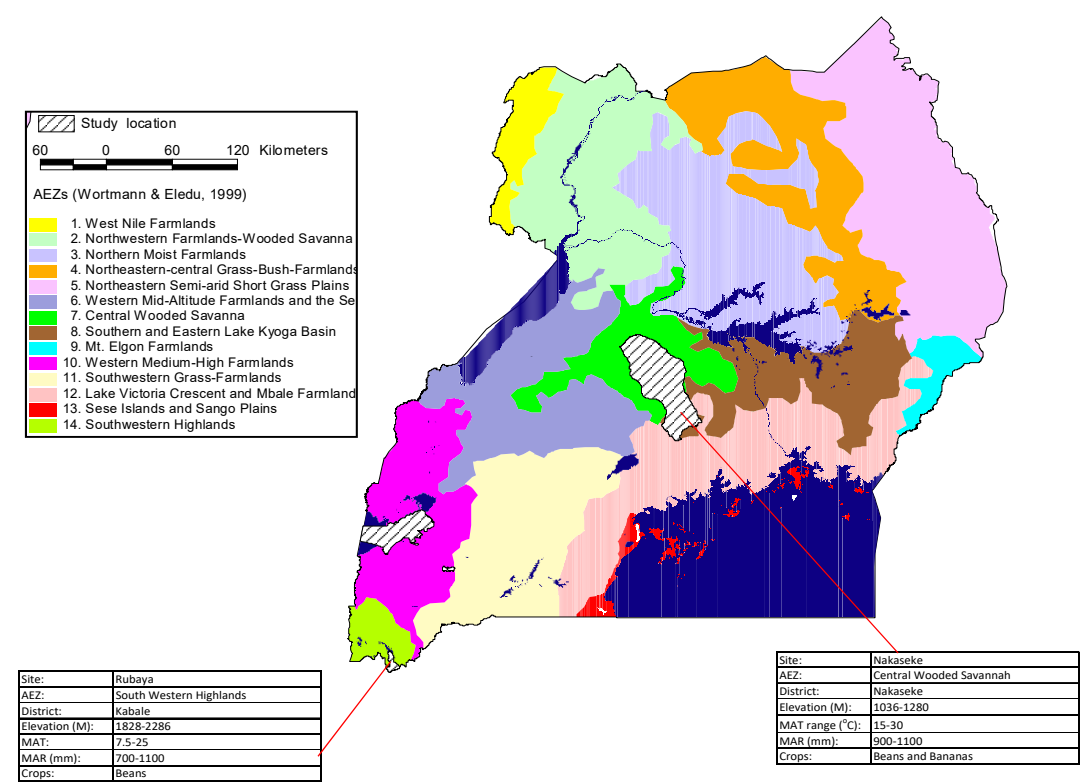

Figure S1. Map of Uganda showing where Nakaseke, Kibuga and Rubaya community seedbanks are located.

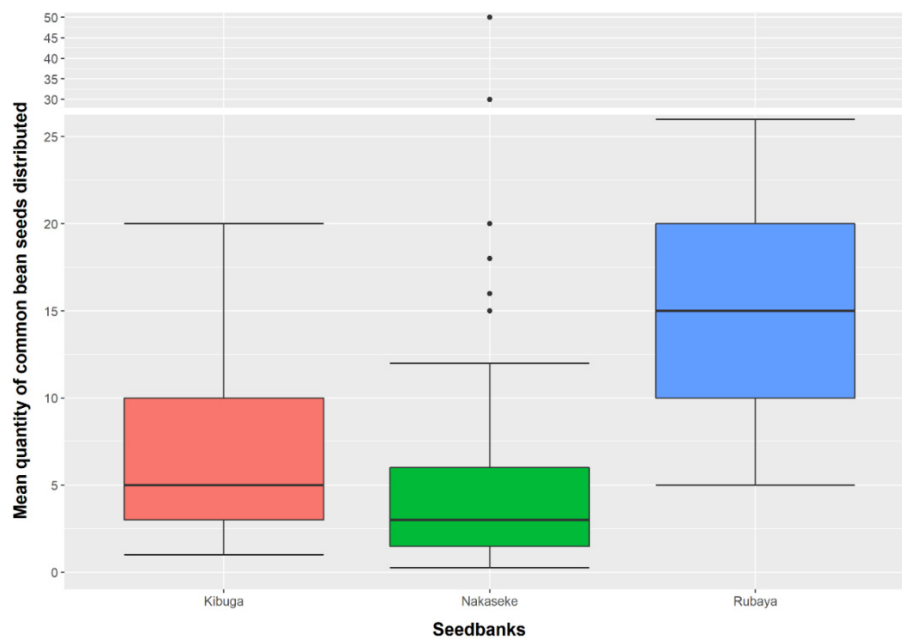

**Figure S2.** Box plots of the mean quantity of common bean seed (kg) distributed by each seed bank over the study period (Nakaseke and Rubaya 2017-2020; Kibuga 2018, 2019 and 2020).

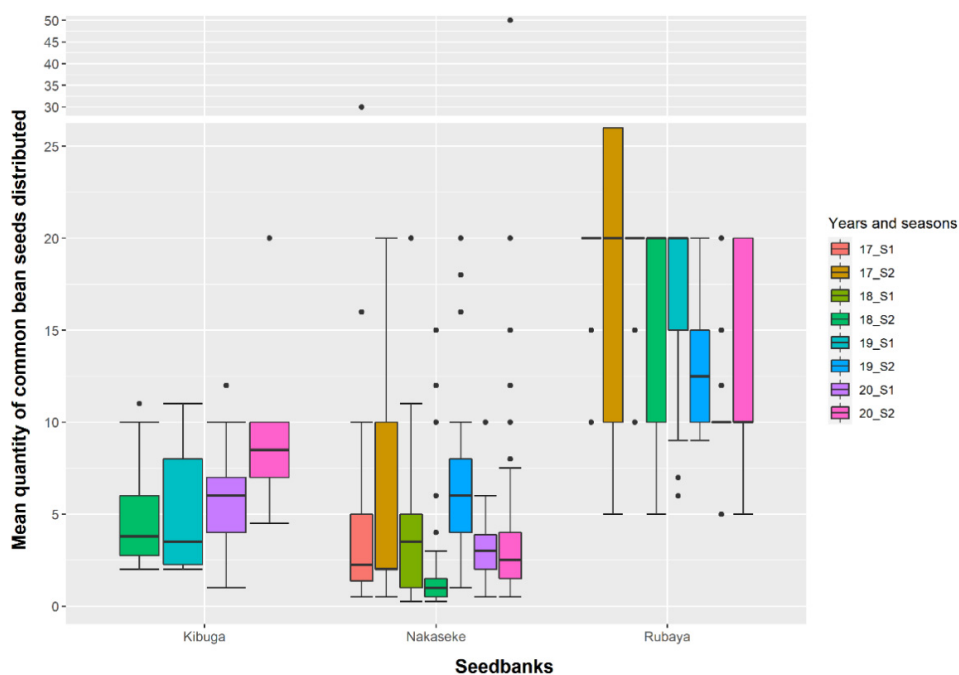

**Figure S3.** Box plots of the mean quantity of common bean seed (kg) distributed by the seedbanks in each of the two growing seasons from the year 2017 to 2020.

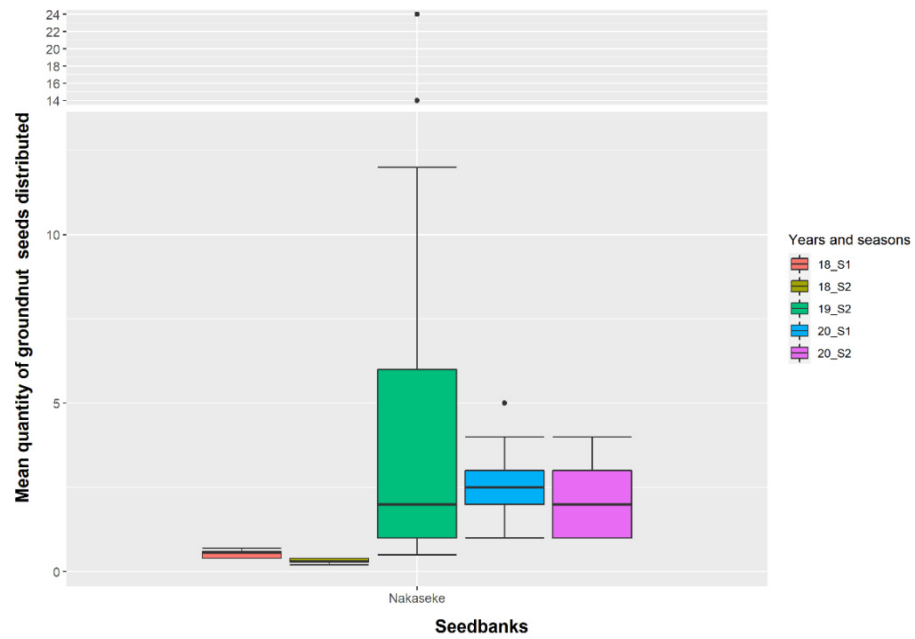

**Figure S4.** Box plots of the mean quantity of groundnut seeds (kg) distributed by Nakaseke seedbank in the two growing seasons of 2018, 2019 and 2020.

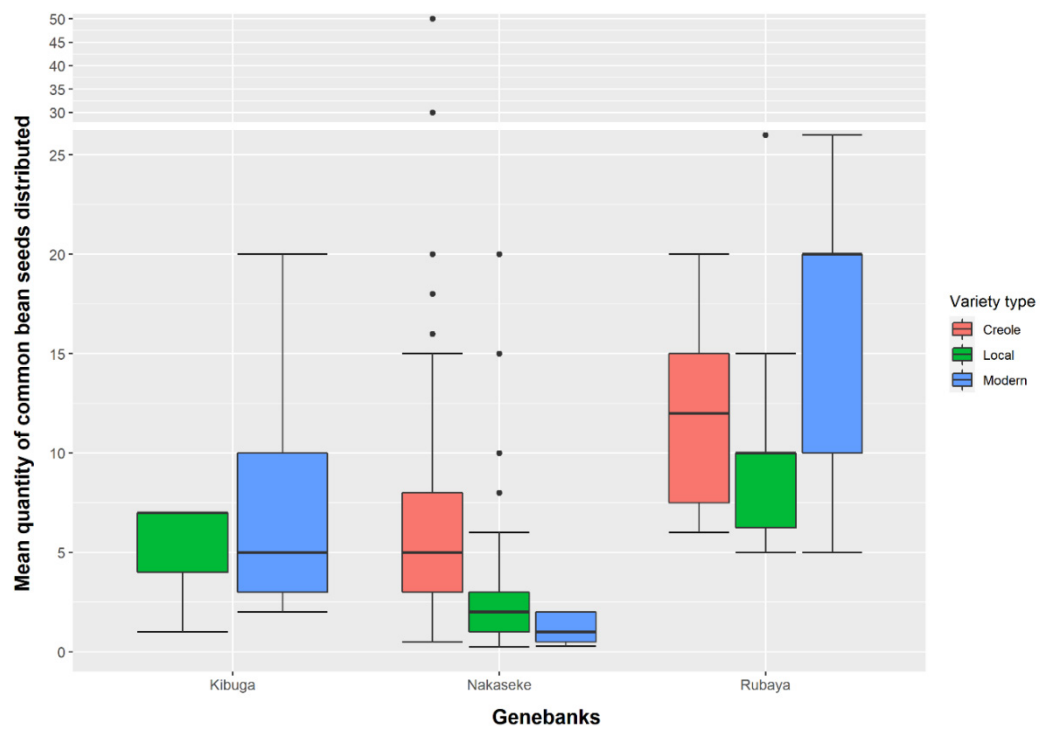

**Figure S5.** Box plots of the mean quantity of common bean seed (kg) of each variety type distributed by the seedbanks.

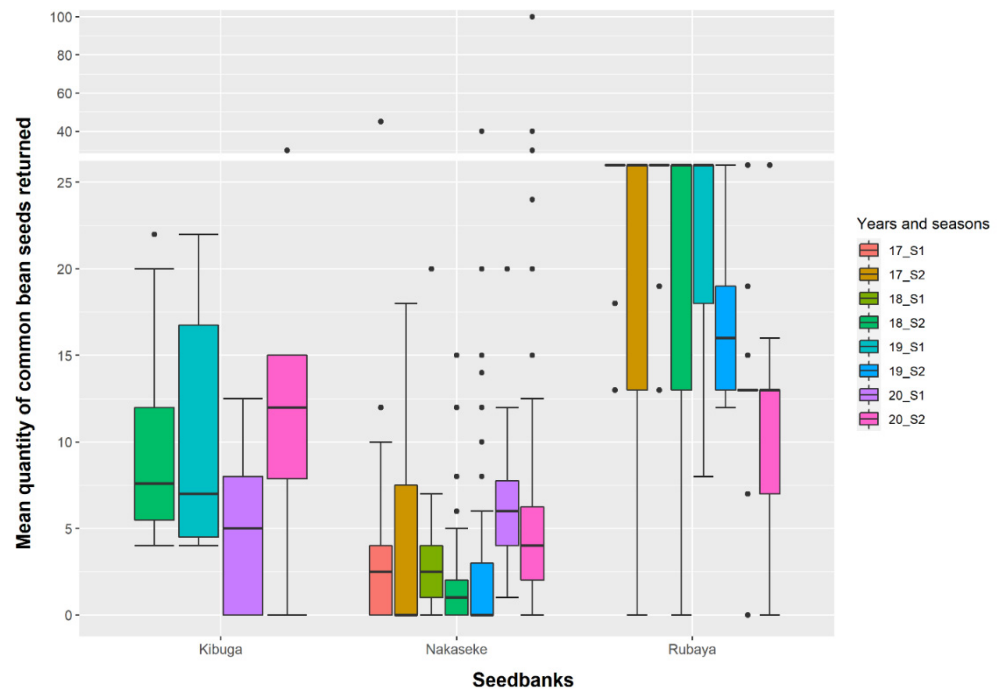

**Figure S6 . Box plots of the mean quantity of common bean seeds (kg) returned every season to the respective community seedbanks during the study years.**

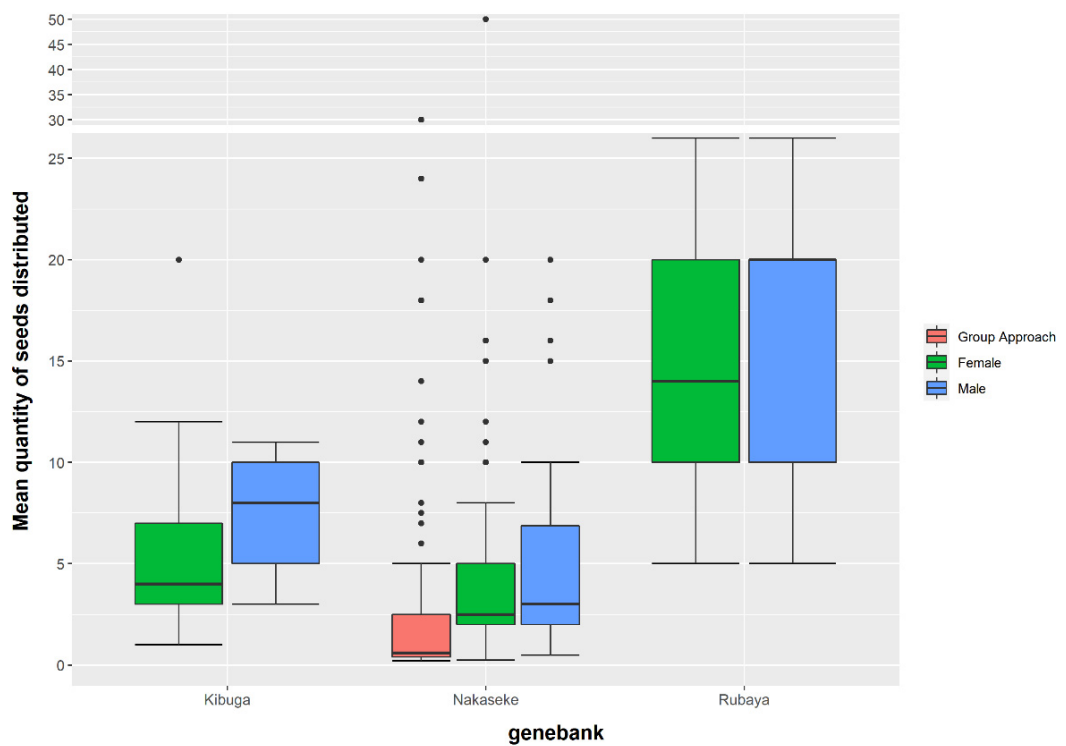

**Figure S7. Box plots of the mean quantity of seeds (kg) distributed by gender in each seedbank.**

## 2. TABLES

**Table S1. Characteristics of the studied CSBs**

| Characteristic                            | Kibuga                                                                | Nakaseke                                                              | Rubaya                                                                                  |
|-------------------------------------------|-----------------------------------------------------------------------|-----------------------------------------------------------------------|-----------------------------------------------------------------------------------------|
| Year of establishment                     | 2018                                                                  | 2014                                                                  | 2012                                                                                    |
| Type of ownership                         | Communal but in the process of forming a community-based organization | Communal but in the process of forming a community-based organization | Private by Kagyera Bataka Farmers group                                                 |
| Seed distribution mechanism               | Individuals                                                           | Individuals and groups                                                | Individuals                                                                             |
| Returning mechanism                       | Twice the amount borrowed in kg                                       | Twice the amount borrowed in kg                                       | One and a half of the quantity borrowed in kg                                           |
| Management                                | Committee that reports to the general community                       | Committee that reports to the general community                       | Committee that reports to the management committee for the Kagyera Bataka Farmers Group |
| Number of Common bean varieties conserved | 14                                                                    | 31                                                                    | 7                                                                                       |
| Creole varieties                          | 1                                                                     | 2                                                                     | -                                                                                       |
| C. bean local varieties                   | 2                                                                     | 22                                                                    | 2                                                                                       |
| C. bean modern varieties                  | 11                                                                    | 7                                                                     | 5                                                                                       |
| Number of groundnut varieties conserved   | -                                                                     | 28                                                                    | -                                                                                       |
| Local g. nut varieties                    | -                                                                     | 12                                                                    | -                                                                                       |

|                         |   |    |   |
|-------------------------|---|----|---|
| Modern g. nut varieties | - | 16 | - |
|-------------------------|---|----|---|

**Table S2. Summary statistics of the quantities of seeds distributed, returned and balances of seed that had not yet been returned to the seedbanks over the study period**

| Seed bank | Species   | S L | varieties | Mean QD | SD QD | Mean QR | SD QR | Mean B | SD B  |
|-----------|-----------|-----|-----------|---------|-------|---------|-------|--------|-------|
| Kibuga    | C. beans  | 41  | 9         | 6.222   | 3.902 | 9.363   | 7.002 | 3.08   | 4.668 |
| Nakaseke  | C. beans  | 453 | 46        | 4.171   | 4.604 | 4.523   | 7.440 | 3.829  | 6.625 |
|           | Groundnut | 172 | 26        | 2.844   | 2.697 | 3.575   | 5.689 | 2.134  | 5.876 |
| Rubaya    | C. beans  | 175 | 13        | 14.920  | 5.804 | 18.023  | 7.667 | 1.785  | 4.196 |

**SL: Number of seeds lots, QD: quantity distributed from seedbank;  
SD: standard deviation; QR quantity returned to seed bank; B: balance  
which is seed not yet returned.**

**Table S3. The monthly rainfall totals in mm of rainfall received in Nakaseke from January 2019 to August 2021.**

|      | Jan  | Feb  | Mar   | Apr   | May   | Jun   | Jul  | Aug   | Sep   | Oct   | Nov   | Dec   |
|------|------|------|-------|-------|-------|-------|------|-------|-------|-------|-------|-------|
| 2019 | 94.8 | 76   | 90.1  | 159.9 | 181.3 | 170.7 | 25.4 | 83.9  | 173.6 | 293.8 | 175.7 | 232.2 |
| 2020 | 92.7 | 131  | 304.1 | 169   | 203.4 | 40.7  | 87.7 | 139.8 | 127.5 | 177.6 | 284.5 | 137.2 |
| 2021 | 105  | 48.8 | 147.8 | 191.9 | 295.2 | 40.1  | 56.2 | 210.2 |       |       |       |       |

Source: Uganda Meteorological Authority, September 2021

**Table S4. Quantity of groundnut seeds (kg) borrowed and returned in the respective seasons in Nakaseke seedbank.**

|      | Season 1                     |                              | Season 2                     |                              |
|------|------------------------------|------------------------------|------------------------------|------------------------------|
| year | Total Quantity borrowed (Kg) | Total Quantity returned (Kg) | Total Quantity borrowed (Kg) | Total Quantity Returned (Kg) |
| 2018 | 52                           | 253                          | 37                           | 164                          |
| 2019 | 61.65                        | 95.75                        | 230                          | 95.75                        |
| 2020 | 77                           | 148.5                        | 80                           | 82.5                         |

**Table S5. Summary statistics about the access to seed by the two gender groups**

| CSB      | Species     | Gender       | S L       | Varieties | Mean QD | SD QD | Mean QR | SD QR  | Mean B | SD B  |
|----------|-------------|--------------|-----------|-----------|---------|-------|---------|--------|--------|-------|
| Kibuga   | Common bean | Female       | 29        | 9         | 5.728   | 4.114 | 8.445   | 6.432  | 3.01   | 4.039 |
|          |             | Male         | 12        | 4         | 7.417   | 3.175 | 11.583  | 8.084  | 3.25   | 6.137 |
| Nakaseke | Common bean | Female       | 163       | 19        | 4.716   | 5.338 | 5.144   | 9.905  | 4.288  | 6.120 |
|          |             | Male         | 67        | 13        | 5.724   | 5.316 | 5.799   | 6.813  | 5.649  | 9.343 |
|          |             | group        | 233       | 41        | 3.306   | 3.502 | 3.681   | 5.071  | 2.947  | 5.843 |
|          | Groundnut   | Female       | 53        | 16        | 2.170   | 0.985 | 2.849   | 2.299  | 1.491  | 2.185 |
|          |             | Male         | 20        | 12        | 2.375   | 0.809 | 3.375   | 2.465  | 1.375  | 2.345 |
|          |             | group        | 99        | 26        | 3.299   | 3.399 | 4.008   | 7.226  | 2.632  | 7.487 |
| Rubaya   | Common bean | Female       | <b>84</b> | 10        | 14.821  | 5.889 | 81      | 17.778 | 2.125  | 4.133 |
|          |             | Male         | <b>82</b> | 9         | 15.768  | 5.509 | 81      | 18.926 | 1.804  | 4.252 |
|          |             | Not recorded | 9         | 3         | 8.111   | 2.421 | 9       | 12.111 | -1.567 | 2.954 |

SL: number of seeds lots, SD: standard deviation; QD: quantity distributed from the community seedbank; QR: quantity returned to community seedbank, B: balance, which was seed not yet returned to the community seedbank
